# Supplementary material for: Picea wilsonii Transcription Factor PwNAC38 Promotes Drought and Salt Tolerance in Transgenic Arabidopsis and Apple Calli
Source: MDPI journal article supplement (doi:10.3390/f13081304), 2022-08-16
Supplement: s1 [file s1]

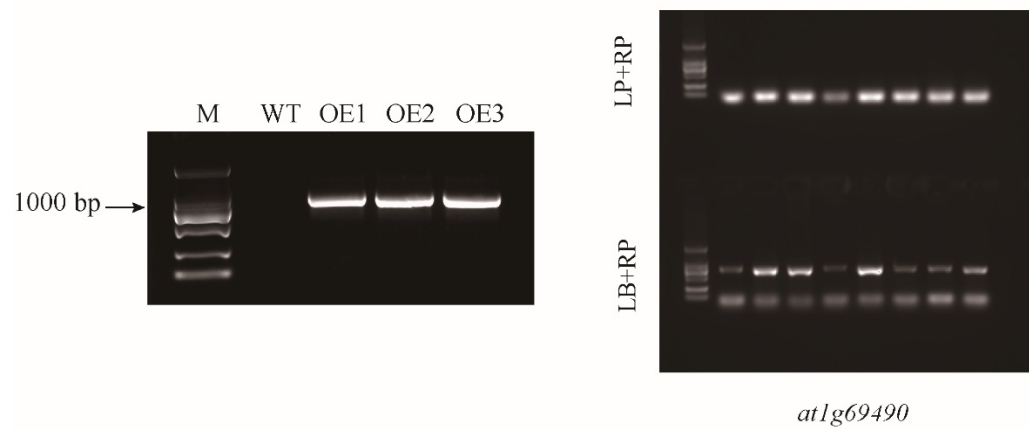

Supplement Figure S1 Identification of transgenic *PwNAC38* plants of *Arabidopsis thaliana*.

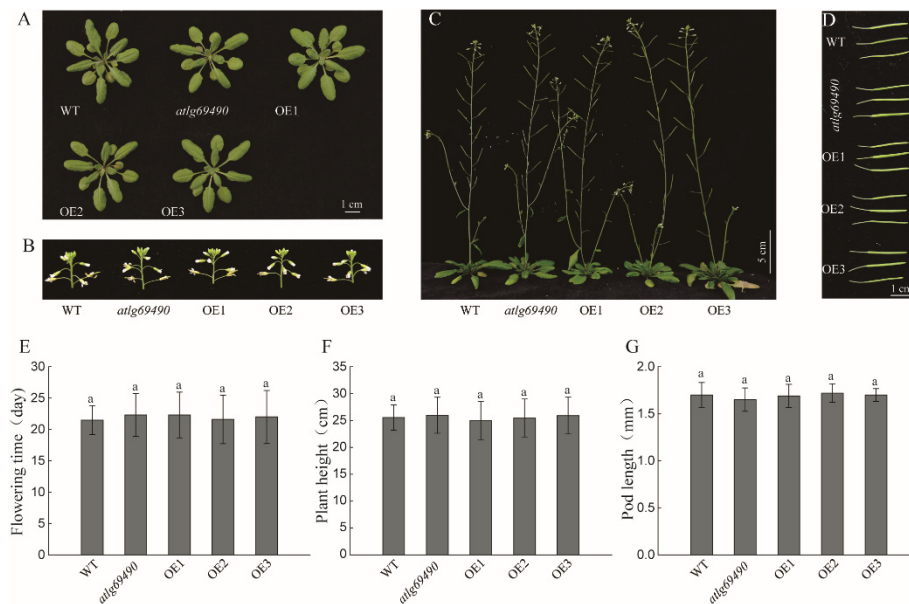

Supplement Figure S2 Effects of overexpression *PwNAC38* on growth and development of *Arabidopsis*. (A) Morphology of rosette leaves. Phenotype (B) and statistics (E) of flowering time under normal conditions. Phenotype (C) and statistics (F) of plant height under normal conditions. Phenotype (D) and statistics (G) of pod length under normal conditions. Similar letters indicate no significant difference under Dunnett's test ( $P < 0.05$ ).

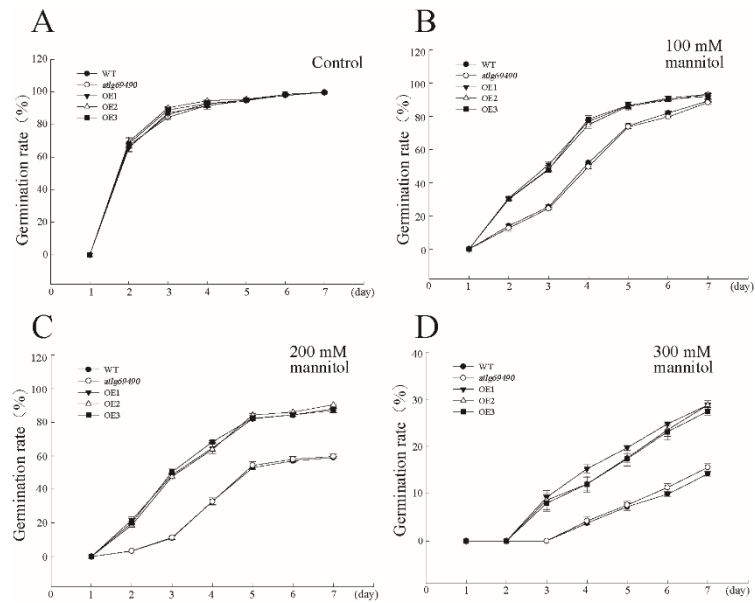

Supplement Figure S3 Statistics of germination rates within 7 days after different concentrations of mannitol treatment.

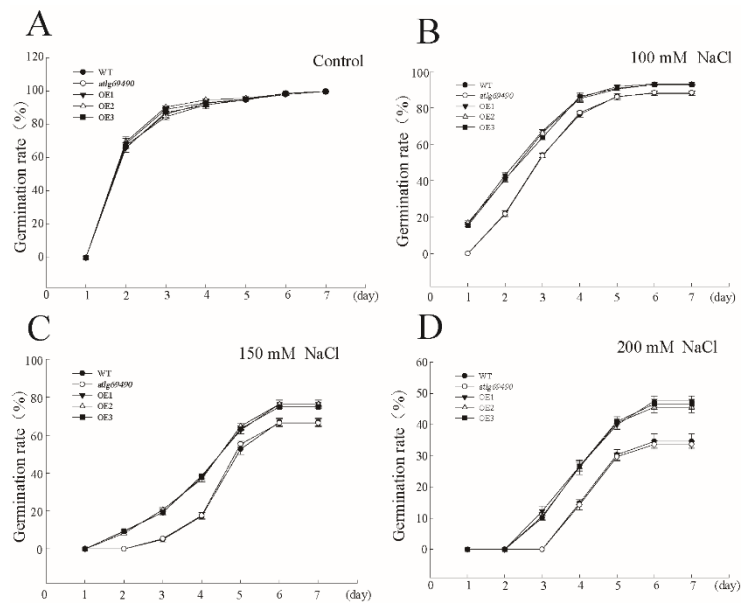

Supplement Figure S4 Statistics of germination rates within 7 days after different concentrations of NaCl treatment.

Supplement Table S1 Primers used in this experiment

| Application           | Primer name | Sequence(5'—3')                                                                          |
|-----------------------|-------------|------------------------------------------------------------------------------------------|
| RT-qPCR               | ANAC019     | F: AATTCAGCAACAACGGTACTTC<br>R: GGTTTCTGTTCGGTTAAGTCC                                    |
|                       | ATHB-7      | F: GCAAGTGGCTATATGGTTTCAG<br>R: GAAGCCAAGTTGTCGTAGTTTT                                   |
|                       | DREB2A      | F: CATGTTTGATGTCGATGAGCTT<br>R: ATTCCGTAGTTGAGGCTTTGTA                                   |
|                       | ERD1        | F: CTTTCTCTATCAGCACGAAACG<br>R: CGGTGCGATATATTGACAATCC                                   |
|                       | RD29A       | F: TTCTGTAAGGACGACGTTTACA<br>R: CGTACTCGTTACATCCTCTGTT                                   |
|                       | ABF3        | F: GATGTGGTTAACCGTTCTCAAC<br>R: CAGCTTGCAGTAGATTGTTGTT                                   |
|                       | ABI5        | F: AATAAGAGAGGGATAGCGAACG<br>R: GCTACCACCACCTCTATGTATC                                   |
|                       | NCED3       | F: GATGAATTTGTTCAGAGAGCG<br>R: AACACTAGGATCAGCCGTTTTA                                    |
|                       | Actin       | F: GGTAACTTGTGCTCAGTGGTGG<br>R: AACGACCTTAATCTTCATGCTGC                                  |
|                       | PwNAC38-    | F: ATGACCTTCTTAGCTTCGAATCCC<br>PwNAC38-CDS- <i>ceXu</i> -R: TTAATAATCTTCCAAGGGATTGAA     |
|                       | CDS-        |                                                                                          |
|                       | PwNAC38-    | F: <u>GATTACGCTCATATGATGACCTTCTTAGCTT</u><br>R: <u>ACCCGGGTGGAATTCCTTAATAATCTTCCAAG</u>  |
|                       | AD          |                                                                                          |
| Vector construction   | PwNAC38-    | F: <u>GAGGACCTGCATATGATGACCTTCTTAGCTT</u><br>R: <u>CCGCTGCAGGTCGACTTAATAATCTTCCAAG</u>   |
|                       | BD          |                                                                                          |
|                       | PwNAC38-    | F: <u>CGGGCTGCAGGAATTCATGACCTTCTTAGCTT</u><br>R: <u>CCCCCTCGAGGTCGACTTAATAATCTTCCAAG</u> |
|                       | 1205        |                                                                                          |
| Mutant identification | LP          | CTTTTAAACCGTGGCTGTTTG                                                                    |
|                       | RP          | GTCCCCGAACCAACTAGACTC                                                                    |
|                       | LB          | ATTTTGCCGATTTCGGAAC                                                                      |

Wavy lines in the primers indicate the overlapping sequences of seamlessly cloned linear vectors.
